# Supplementary material
Source: PubMed Central journal article supplement (PMC4699876)
Supplement: NIHMS743853-supplement-3.pdf [file NIHMS743853-supplement-3.pdf]

### Electronic Supplementary Material 3

het. G85R-SOD1:YFP

G93A→G85R-YFP

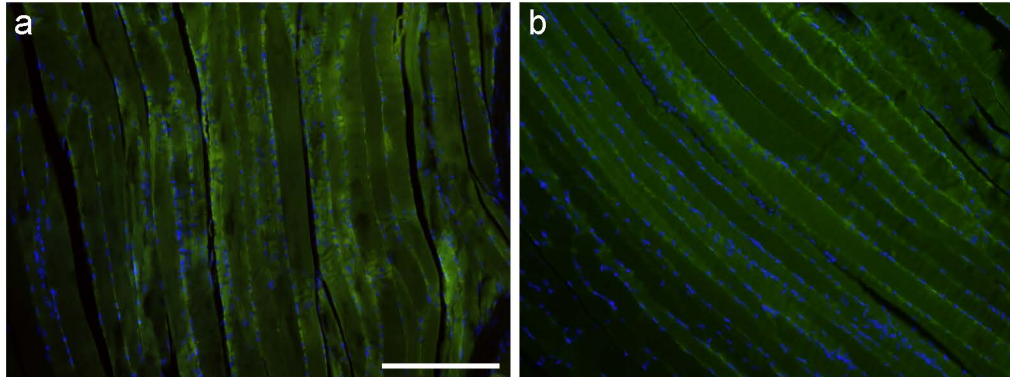

**ESM3** Lack of G85R-SOD1:YFP deposition in the ipsilateral gastrocnemius muscle of mice at 8.5 months p.i. that were injected with homogenate from an asymptomatic heterozygous G85R-SOD1:YFP mouse (a) or from an end-stage paralyzed mouse that was injected with G93A→G85R-YFP homogenate (b). *Scale bars 200 μm.*
